# Supplementary material for: Neuronal signals regulate obesity induced β-cell proliferation by FoxM1 dependent mechanism
Source: PubMed Central journal article supplement (PMC5717276; doi:10.1038/s41467-017-01869-7), 2017-12-05
Supplement: 41467_2017_1869_MOESM1_ESM.pdf [file 41467_2017_1869_MOESM1_ESM.pdf]

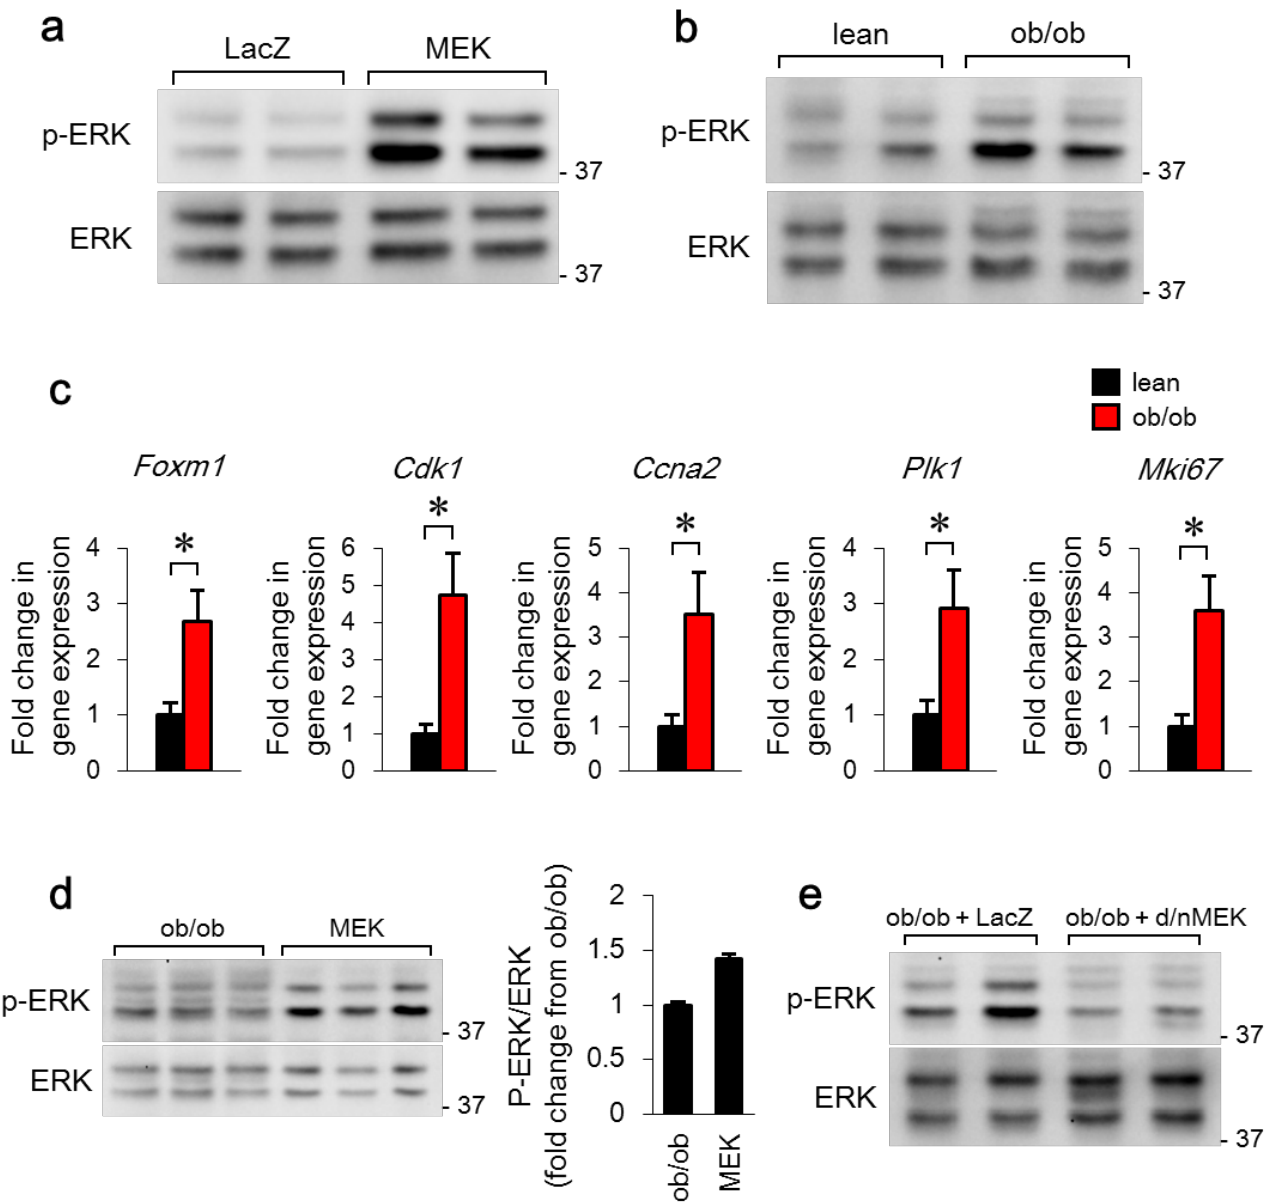

### Supplementary Figure 1

**Expressions of *Foxm1* and target genes as well as that of the *Mki67* gene are increased in islets along with hepatic ERK activation in ob/ob mice.** (a) Hepatic ERK phosphorylation of L-MEK-mice or LacZ-injected mice on day 3 after adenoviral administration. (b) Hepatic ERK phosphorylation of 6 week-old ob/ob mice or lean littermates. (c) Expressions of *Foxm1* and its target genes as well as that of the *Mki67* gene in islets of 6-week-old ob/ob mice or lean littermates are shown. Data are presented as means  $\pm$  s.e.m. \* $P < 0.05$ , assessed by unpaired t test.  $n = 4$ .

(d) Hepatic ERK phosphorylation of ob/ob mice or L-MEK-mice. The right graph shows quantitative data.  $n = 3$ . (e) Hepatic ERK phosphorylation of d/nMEK- or LacZ-injected ob/ob mice.

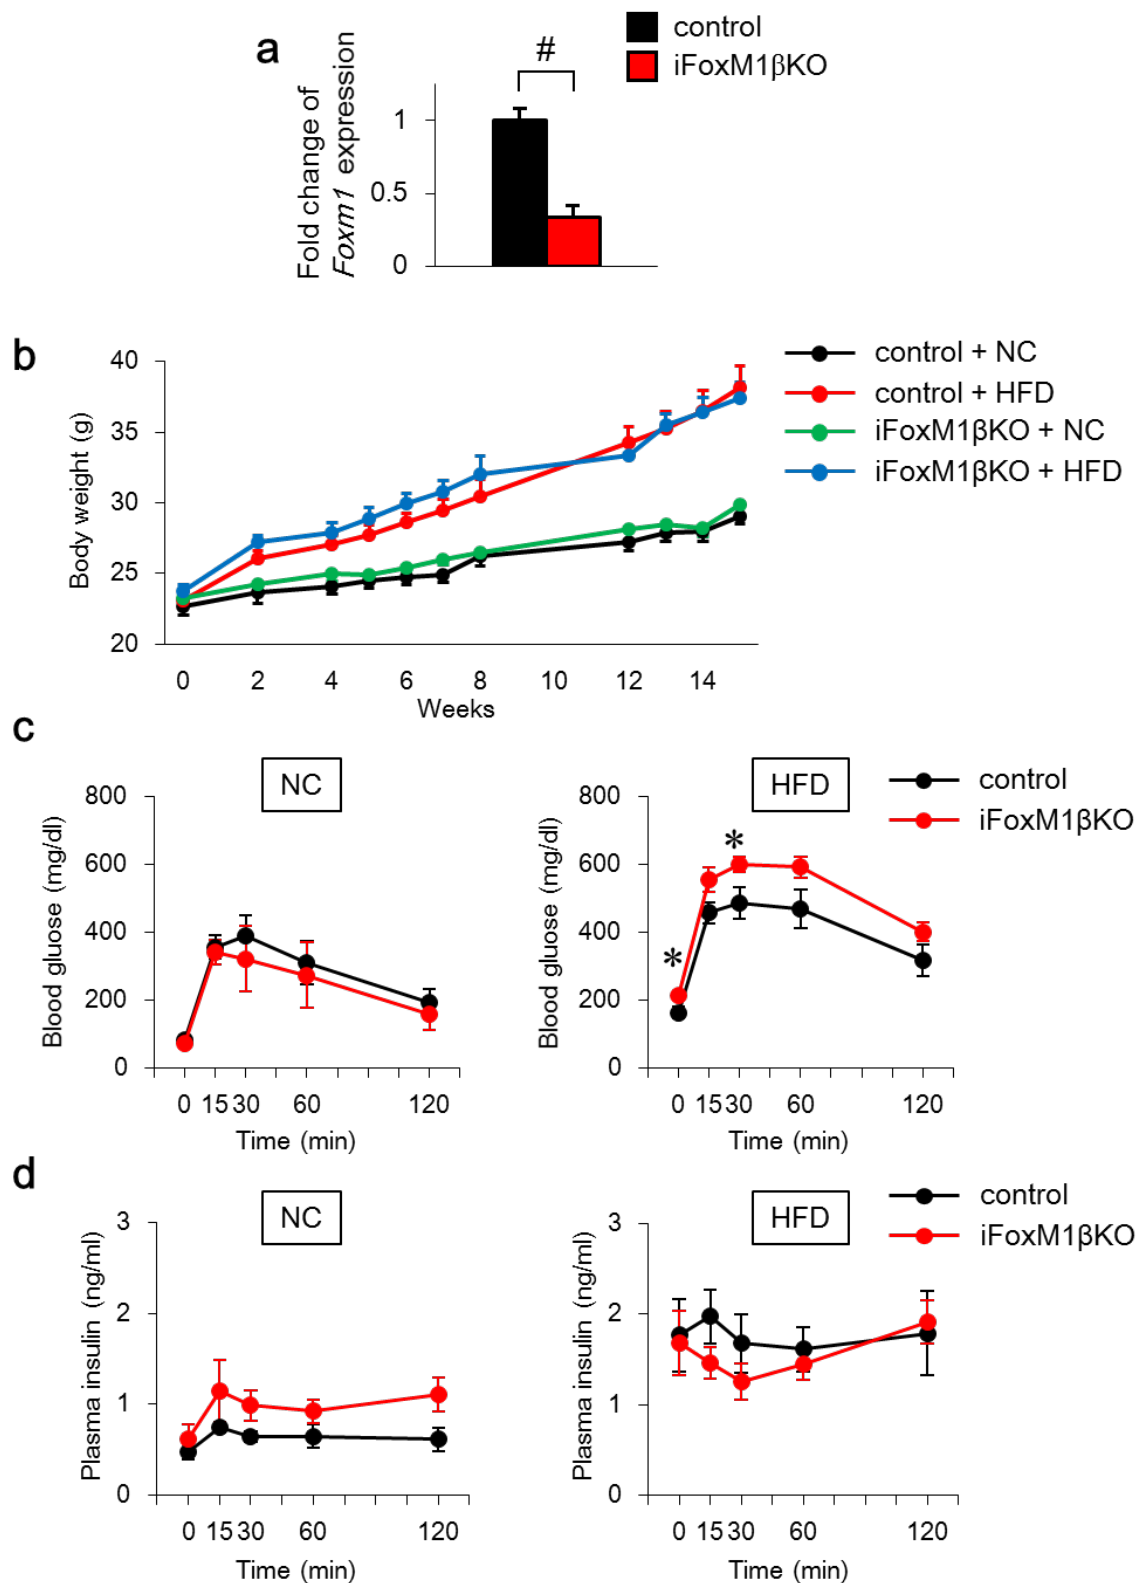

### Supplementary Figure 2

**The phenotypes of iFoxM1 $\beta$ KO mice.** (a) Knockout deficiency of *Foxm1* in islets of iFoxM1 $\beta$ KO mice, on day 7 after the completion of tamoxifen injections. (b) Body weight changes of NC- and HFD-fed iFoxM1 $\beta$ KO mice or control littermates. (c) Blood glucose levels of FoxM1 $\beta$ KO mice and control littermates, after 12 weeks of HFD or NC feeding, during the glucose tolerance test. (d) Plasma insulin levels of FoxM1 $\beta$ KO mice and control littermates, after 12 weeks of HFD or NC feeding, during the glucose tolerance test. Data are presented as means  $\pm$  s.e.m. \* $P < 0.05$ , # $P < 0.01$ , assessed by unpaired t test.  $n = 4$  (a),  $n = 4$  to 10 (b),  $n = 3$  to 6 (c, d).

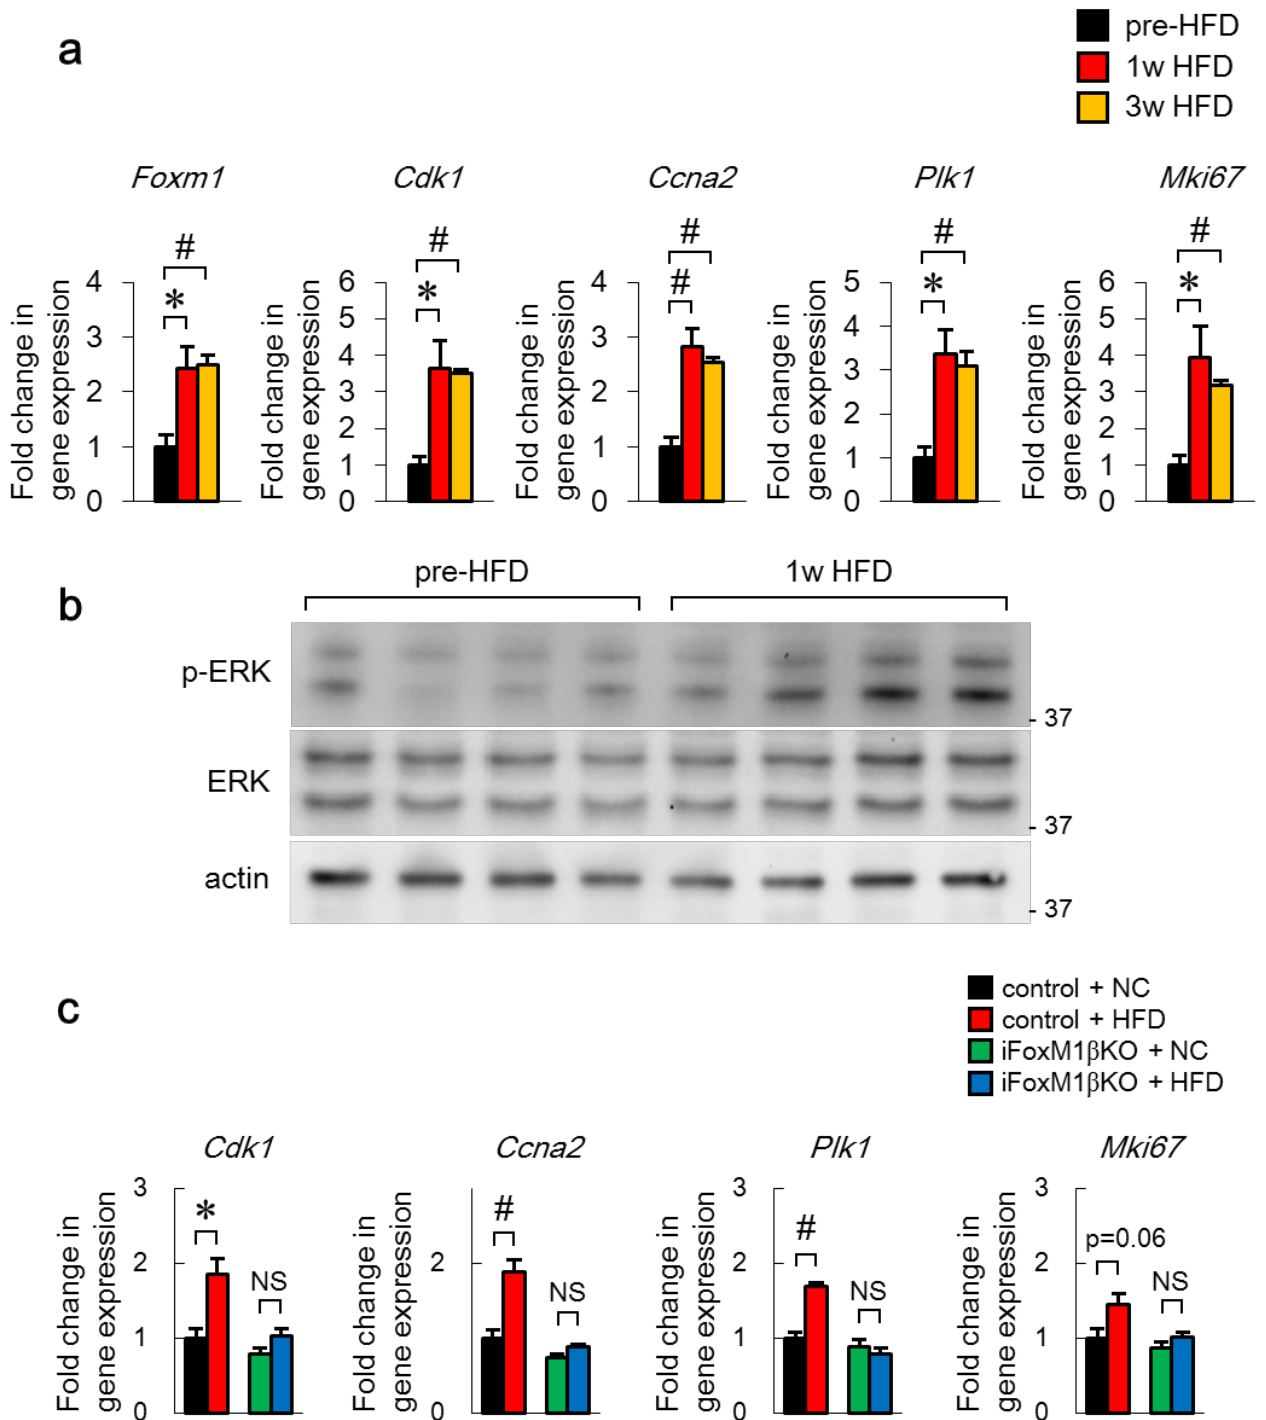

### Supplementary Figure 3

**Up-regulations of FoxM1 target genes and the *Mki67* gene in islets induced by one-week HFD feeding are blocked in iFoxM1βKO mice.** (a) Expressions of *Foxm1* and its target genes as well as that of the *Mki67* gene in islets of C57BL/6N mice after HFD feeding. (b) Hepatic ERK phosphorylation of C57BL/6N mice after one week of HFD feeding and before HFD feeding (pre-HFD). (c) Expressions of FoxM1 target genes and that of the *Mki67* gene in islets of iFoxM1βKO or control littermates, after one week of HFD or NC feeding. Data are presented as means ± s.e.m. \*P < 0.05, #P < 0.01, assessed by unpaired t test. n = 4 or 5 (a), n = 3 to 6 (c).

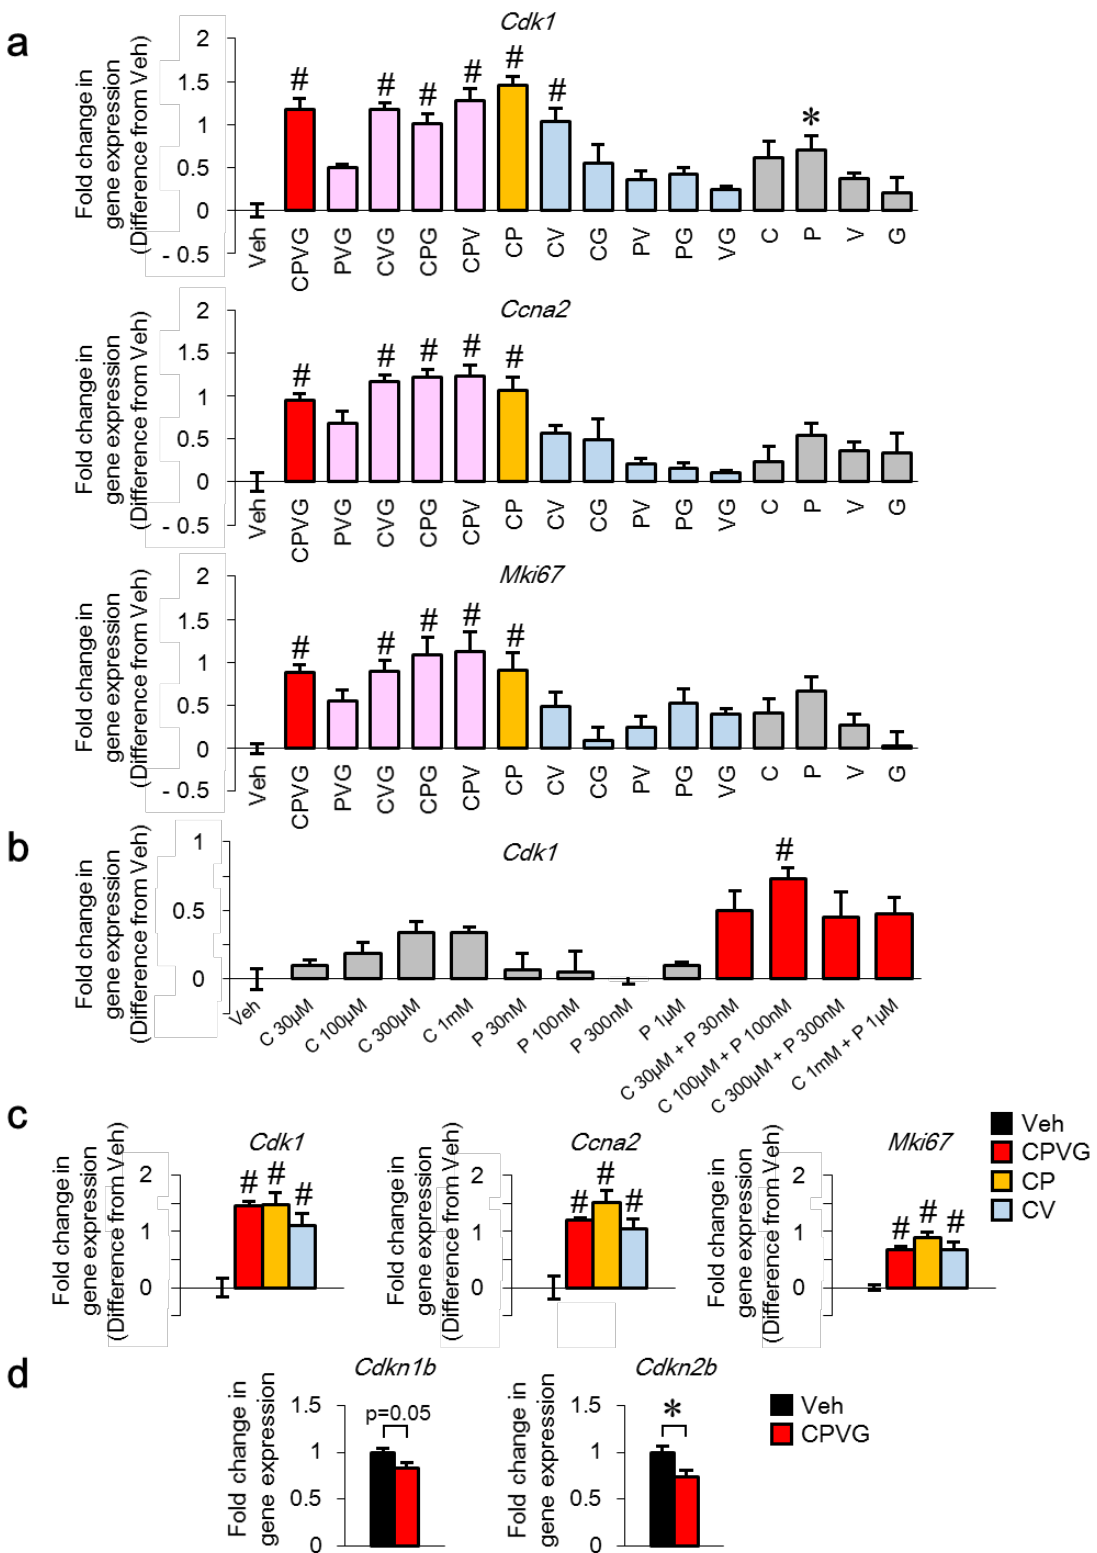

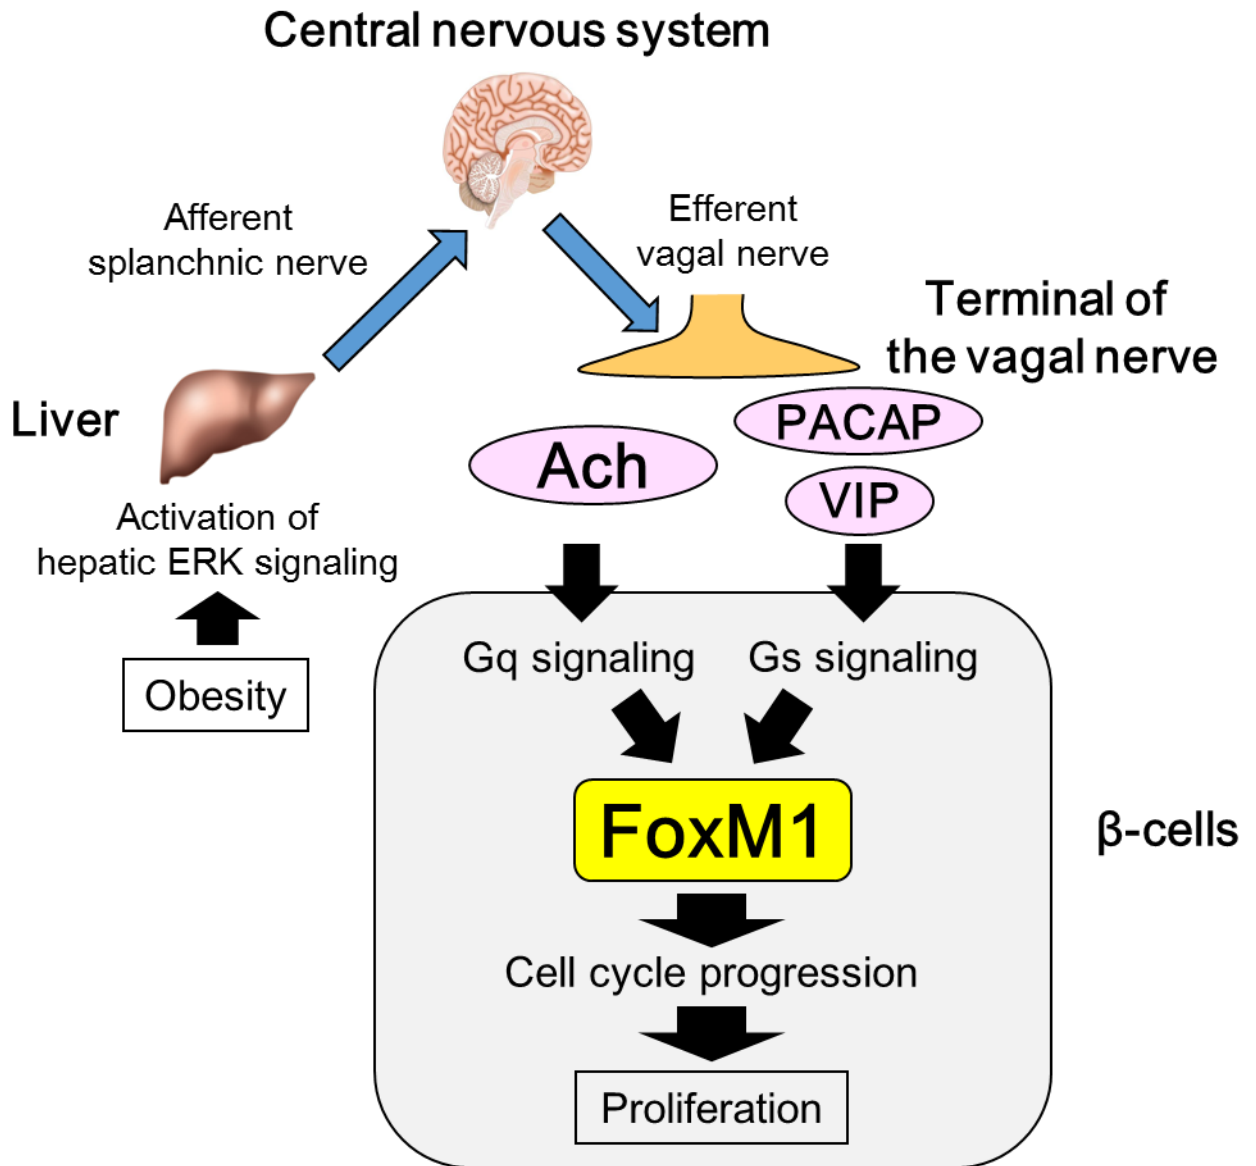

**Supplementary Figure 5**

**Proposed molecular mechanism of  $\beta$ -cell proliferation induced by FoxM1 activation, mediated by vagal factors via the liver-pancreas neuronal relay, during obesity development.**

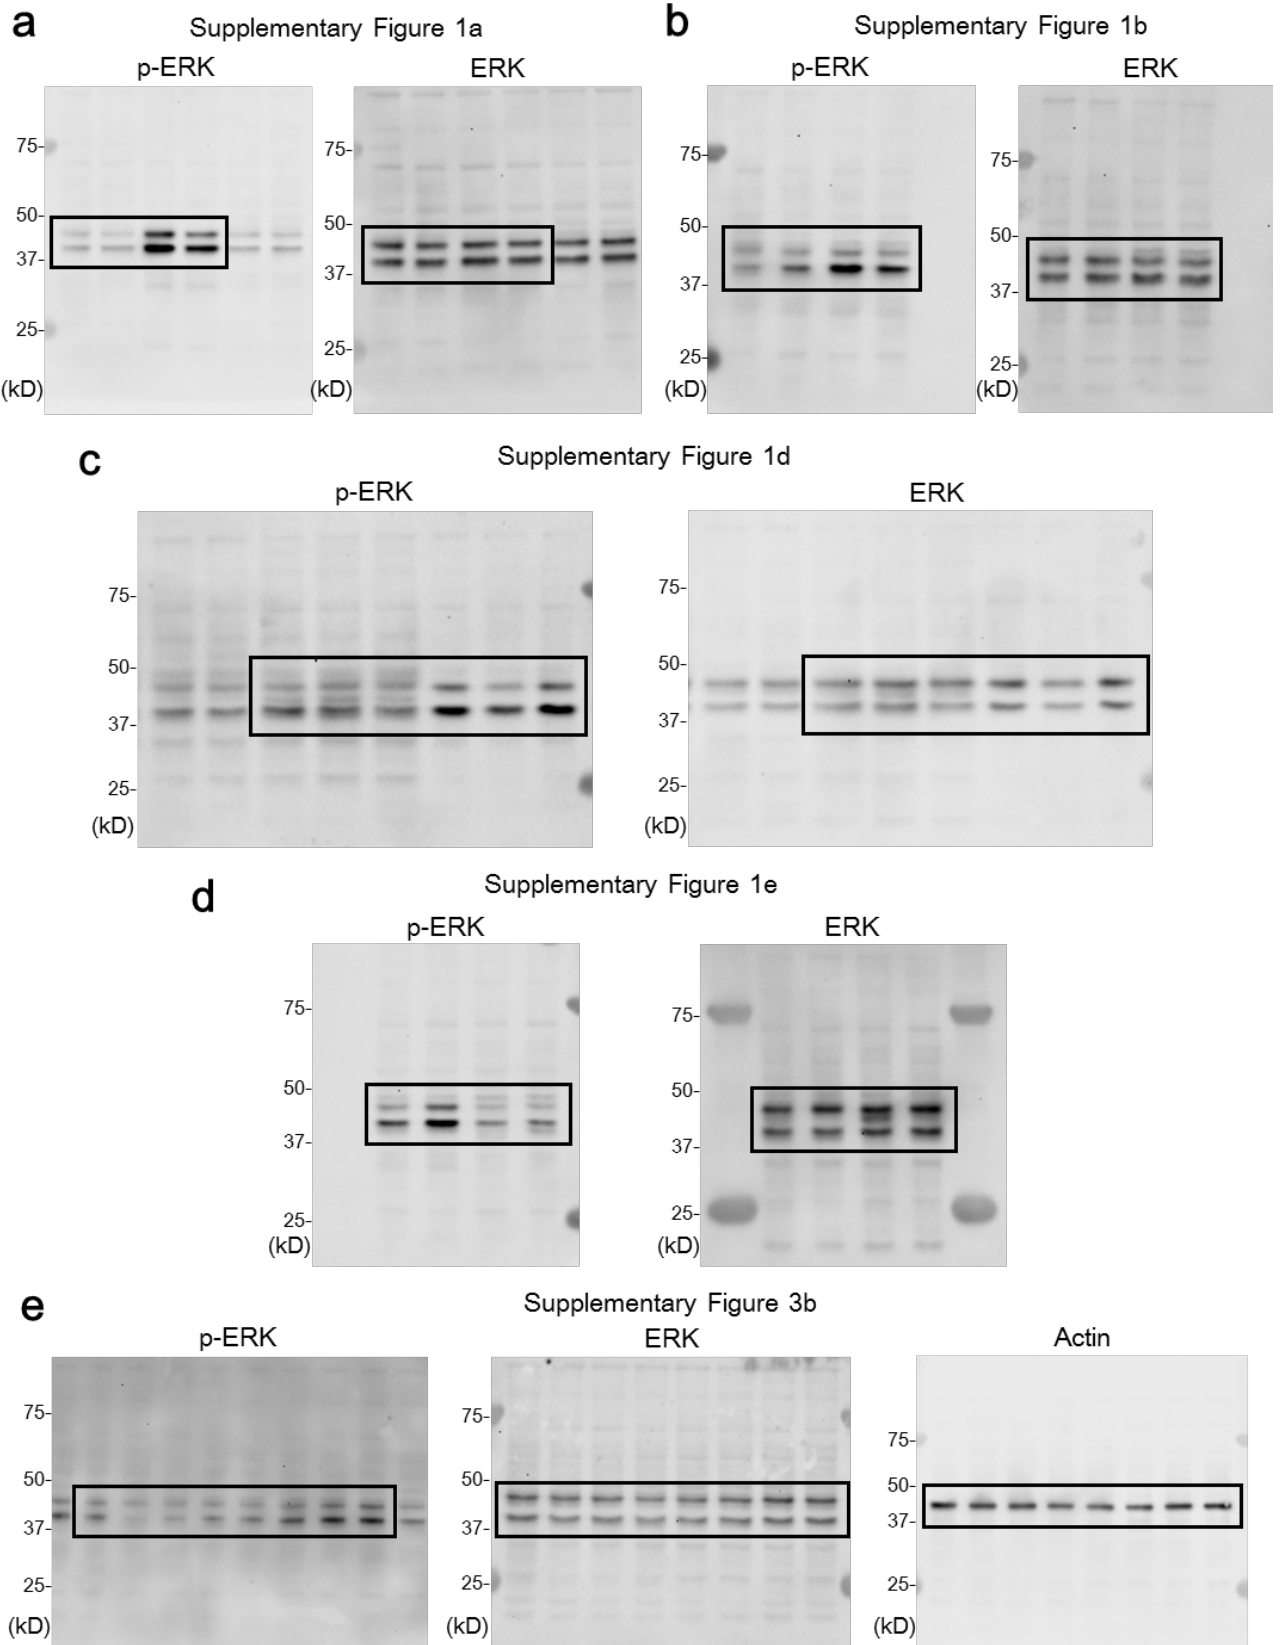

**Supplementary Figure 6**

Uncropped scans of the immunoblots for Supplemental Figure 1a, 1b, 1d, 1e, and 3b.

| Name of the pathway                         | Number of genes | p-value  | Zscore      |
|---------------------------------------------|-----------------|----------|-------------|
| Mm_Complement_and_Coagulation_Cascades_KEGG | 49              | 0        | 9.656881004 |
| Mm_Inflammatory_Response_Pathway            | 26              | 3.30E-12 | 6.964324704 |
| Mm_DNA_replication_Reactome                 | 50              | 1.98E-09 | 5.999469842 |
| Mm_Ribosomal_Proteins                       | 126             | 2.79E-08 | 5.554150507 |
| Mm_Cell_Cycle_KEGG                          | 106             | 2.80E-07 | 5.13623703  |
| Mm_Complement_Activation_Classical          | 12              | 6.25E-07 | 4.983333397 |
| Mm_Nucleotide_GPCRs                         | 14              | 1.03E-05 | 4.411262296 |
| Mm_Striated_muscle_contraction              | 30              | 1.44E-05 | 4.337583038 |
| Mm_Prostaglandin_synthesis_regulation       | 23              | 9.56E-05 | 3.901485993 |
| Mm_Blood_Clotting_Cascade                   | 13              | 1.11E-04 | 3.865389276 |
| Mm_IL-3_NetPath_15                          | 167             | 2.66E-04 | 3.646496808 |
| Mm_Focal_adhesion_KEGG                      | 258             | 4.21E-04 | 3.526311043 |
| Mm_Matrix_Metalloproteinases                | 16              | 6.28E-04 | 3.419072674 |
| Mm_Electron_Transport_Chain                 | 97              | 8.13E-04 | 3.348246787 |
| Mm_S1P_Signaling                            | 37              | 1.26E-03 | 3.225938246 |
| Mm_Nucleotide_Metabolism                    | 24              | 2.34E-03 | 3.043743392 |
| Mm_IL-9_NetPath_20                          | 38              | 7.23E-03 | 2.685902487 |
| Mm_Eicosanoid_Synthesis                     | 17              | 8.82E-03 | 2.618765008 |
| Mm_Apoptosis                                | 117             | 1.01E-02 | 2.57272684  |
| Mm_Triacylglyceride_Synthesis_BiGCaT        | 38              | 1.52E-02 | 2.427472351 |
| Mm_GPCRDB_Class_A_Rhodopsin-like            | 79              | 2.06E-02 | 2.314960402 |
| Mm_B_Cell_Receptor_NetPath_12               | 230             | 2.11E-02 | 2.306240141 |
| Mm_GPCRDB_Other                             | 51              | 0.02137  | 2.301458286 |
| Mm_Proteasome_Degradation                   | 121             | 2.24E-02 | 2.282873819 |
| Mm_IL-4_NetPath_16                          | 100             | 2.44E-02 | 2.250262541 |
| Mm_Cell_Cycle-G1_to_S_control_Reactome      | 93              | 2.76E-02 | 2.202745025 |
| Mm_Smooth_muscle_contraction                | 225             | 0.057745 | 1.897631754 |
| Mm_Osteoclasts                              | 14              | 6.86E-02 | 1.820805622 |
| Mm_T-Cell-Receptor_NetPath_11               | 179             | 7.08E-02 | 1.80670769  |
| Mm_Heme_Biosynthesis                        | 11              | 0.082226 | 1.737914218 |
| Mm_Integrin-mediated_cell_adhesion_KEGG     | 148             | 0.11118  | 1.592910329 |
| Mm_Glycolysis_and_Gluconeogenesis           | 54              | 0.134558 | 1.496367613 |
| Mm_Adipogenesis                             | 172             | 0.135752 | 1.491796743 |
| Mm_Glutathion_Metabolism_KEGG               | 21              | 0.143973 | 1.461154334 |
| Mm_IL-7_NetPath_19                          | 72              | 0.182609 | 1.332764218 |
| Mm_Delta-Notch_NetPath_3                    | 120             | 0.183107 | 1.331248014 |
| Mm_IL-6_NetPath_18                          | 148             | 0.194489 | 1.297414668 |
| Mm_IL-2_NetPath_14                          | 131             | 0.209363 | 1.255318137 |
| Mm_Regulation_of_Actin_Cytoskeleton_KEGG    | 218             | 0.232539 | 1.19384523  |
| Mm_One-carbon_metabolism                    | 40              | 0.240003 | 1.174978832 |
| Mm_Mitochondrial_fatty_acid_betaoxidation   | 20              | 0.261327 | 1.123260044 |
| Mm_Biogenic_Amine_Synthesis                 | 13              | 0.276539 | 1.088126299 |
| Mm_IL-5_NetPath_17                          | 103             | 0.315277 | 1.004209942 |
| Mm_Androgen-Receptor_NetPath_2              | 178             | 0.345283 | 0.943778126 |
| Mm_Fatty_Acid_Beta_Oxidation_1_BiGCaT       | 40              | 0.356741 | 0.921591967 |
| Mm_GPCRDB_Class_B_Secretin-like             | 12              | 0.375717 | 0.885814606 |
| Mm_Peptide_GPCRs                            | 25              | 0.430497 | 0.788340805 |
| Mm_TNF-alpha-NF-kB_NetPath_9                | 288             | 0.45166  | 0.752650816 |

| Name of the pathway                                           | Number of genes | p-value  | Zscore      |
|---------------------------------------------------------------|-----------------|----------|-------------|
| Mm_TGF_Beta_Signaling_Pathway                                 | 63              | 0.475206 | 0.714034194 |
| Mm_Oxidative_Stress                                           | 34              | 0.48863  | 0.692489719 |
| Mm_Translation_Factors                                        | 95              | 0.510544 | 0.657990517 |
| Mm_Statin_Pathway_PharmGKB                                    | 21              | 0.527837 | 0.631310582 |
| Mm_Selenium-metabolism_Selenoproteins                         | 66              | 0.530558 | 0.627155055 |
| Mm_Insulin_Signaling                                          | 237             | 0.555214 | 0.589964472 |
| Mm_Fatty_Acid_Beta_Oxidation_Meta_BiGCaT                      | 47              | 0.592474 | 0.535253978 |
| Mm_Alanine_and_aspartate_metabolism_KEGG                      | 14              | 0.616313 | 0.501081918 |
| Mm_IL-1_NetPath_13                                            | 60              | 0.836666 | 0.206159508 |
| Mm_Hedgehog_Netpath_10                                        | 28              | 0.886807 | 0.142345136 |
| Mm_Alpha6-Beta4-Integrin_NetPath_1                            | 97              | 0.917448 | 0.103648375 |
| Mm_EGFR1_NetPath_4                                            | 272             | 0.920464 | 9.98E-02    |
| Mm_Fas_Pathway_and_Stress_Induction_of_HSP_Regulation_Biocrta | 57              | 0.984587 | 0.01931911  |
| Mm_Calcium_regulation_in_cardiac_cells                        | 197             | 0.885494 | -0.14400846 |
| Mm_Pentose_Phosphate_Pathway                                  | 10              | 0.874124 | -0.15842222 |
| Mm_MAPK_signaling_pathway_KEGG                                | 215             | 0.860705 | -0.17547663 |
| Mm_G13_Signaling_Pathway                                      | 59              | 0.804017 | -0.24815122 |
| Mm_Kit-Receptor_NetPath_6                                     | 106             | 0.686718 | -0.40331356 |
| Mm_Fatty_Acid_Synthesis_BiGCaT                                | 30              | 0.649672 | -0.45421828 |
| Mm_Wnt_NetPath_8                                              | 154             | 0.600842 | -0.52318985 |
| Mm_Cholesterol_Biosynthesis                                   | 31              | 0.597987 | -0.52729767 |
| Mm_Krebs-TCA_Cycle                                            | 46              | 0.59375  | -0.53340927 |
| Mm_Signaling_of_Hepatocyte_Growth_Factor_Receptor_Biocrta     | 58              | 0.589209 | -0.53998291 |
| Mm_MAPK_Cascade                                               | 53              | 0.587082 | -0.54306884 |
| Mm_ESC_Pluripotency_Pathways                                  | 158             | 0.53804  | -0.61578004 |
| Mm_Nuclear_Receptors                                          | 39              | 0.519718 | -0.64378063 |
| Mm_Notch_signaling_KEGG                                       | 29              | 0.491376 | -0.68812241 |
| Mm_Nuclear_receptors_in_lipid_metabolism_and_toxicity         | 21              | 0.474887 | -0.71454955 |
| Mm_Glycogen_Metabolism                                        | 33              | 0.455388 | -0.74646205 |
| Mm_p38_MAPK_signaling_pathway                                 | 48              | 0.44445  | -0.76470101 |
| Mm_G_Protein_Signaling                                        | 138             | 0.432529 | -0.78487123 |
| Mm_Tryptophane_Metabolism_KEGG                                | 41              | 0.431311 | -0.78695102 |
| Mm_Fatty_Acid_Beta_Oxidation_3_BiGCaT                         | 10              | 0.423721 | -0.79998201 |
| Mm_Urea_cycle_and_metabolism_of_amino_groups_KEGG             | 22              | 0.387627 | -0.86392917 |
| Mm_RNA_transcription_Reactome                                 | 62              | 0.36714  | -0.90184441 |
| Mm_mRNA_processing_binding_Reactome                           | 745             | 0.351944 | -0.930826   |
| Mm_HSP70_and_Apoptosis                                        | 30              | 0.232434 | -1.19411191 |
| Mm_Ovarian_Infertility_Genes                                  | 38              | 0.186494 | -1.32102328 |
| Mm_Small_ligand_GPCRs                                         | 10              | 9.44E-02 | -1.67284733 |
| Mm_Wnt_Signaling                                              | 98              | 0.085966 | -1.71707461 |
| Mm_Hypertrophy_model                                          | 20              | 6.90E-02 | -1.81861192 |
| Mm_Acetylcholine_Synthesis                                    | 12              | 3.88E-02 | -2.06649866 |
| Mm_TGF-beta-Receptor_NetPath_7                                | 227             | 3.05E-02 | -2.16379703 |
| Mm_Id_NetPath_5                                               | 66              | 6.26E-03 | -2.73386594 |
| Mm_Circadian_Exercise                                         | 85              | 1.12E-03 | -3.25798697 |

## Supplementary Table 1

Results of pathway analysis of microarray data obtained from the islets of L-MEK-mice compared to that obtained from the islets of LacZ-injected mice.

|                     | forward (5' to 3')      | reverse (5' to 3')        |
|---------------------|-------------------------|---------------------------|
| <i>Mouse Foxm1</i>  | GCTCCATAGAAATGTGACCATC  | AACCTTCACTGAGGGCTGTAAC    |
| <i>Mouse Cdk1</i>   | AAGAACCTGGACGAGAACG     | GTCATCAAAGTACGGGTGCT      |
| <i>Mouse Ccna2</i>  | CCTTAAGTACCTGCCTTCACTC  | ACAAGGCTTAAGACTCTCCA      |
| <i>Mouse Plk1</i>   | ACGGCACC GTGCAGATTA     | AGGCGGTACGTTT GGAAGTC     |
| <i>Mouse Mki67</i>  | AGTCTCTGGAGAGTCTGATGTTA | ACTTCTTGGTGCATACAATGTC    |
| <i>Mouse Cdkn1b</i> | CGACGCCAGACGTAAACAG     | CAGTGCTTATACAGGATGTCCA    |
| <i>Mouse Cdkn2b</i> | CGCTGCCACTGGAGATTGA     | CGTGCTTGCAGTCTTCCTAGATG   |
| <i>Mouse Actb</i>   | GATGCCCTGAGGCTCTT       | TGTGTTGGCATAGAGGTCTTTAC   |
| <i>Rat Cdk1</i>     | CACGTCAAGAACCTGGATG     | GATCTGATTGTCCAAGTCGTC     |
| <i>Rat Ccna2</i>    | GCTCTCTACACAGTCACAGGACA | GGTGAAGGTCCATGAGACAAG     |
| <i>Rat Mki67</i>    | ATCCAGATGTTAGGCGTTTGAG  | ACAGTTTCACTTTTCTGGTGACTTC |
| <i>Rat Actb</i>     | CCTAGCACCATGAAGATCAAGA  | GTGTA AACGCAGCTCAGTAAC    |

**Supplementary Table 2**  
**Sequences of quantitative RT-PCR primers.**
